# Supplementary material
Source: PubMed Central journal article supplement (PMC6912073)
Supplement: AEM.01522-19-s0001.pdf [file AEM.01522-19-s0001.pdf]

**Table S1. Accession numbers for genes onto which the transcription data were mapped**

| <b>Hydrogenase</b>                        | <b>Predicted gene product</b>                   | <b>Direction</b>                           | <b>Contig #</b>   | <b>Location on contig</b> | <b>protein accession #</b> |                |
|-------------------------------------------|-------------------------------------------------|--------------------------------------------|-------------------|---------------------------|----------------------------|----------------|
| 1e                                        | HypD hydrogenase expression/ formation protein  | r                                          | NZ_AFOC01000025.1 | 17,632..18,728            | WP_006475468.1             |                |
|                                           | HypB hydrognease nickel incorporation protein   | r                                          | NZ_AFOC01000025.1 | 18,785..19,602            | WP_006475469.1             |                |
|                                           | HypA/F hydrogenase expression/formation protein | r                                          | NZ_AFOC01000025.1 | 19,678..20,034            | WP_005960734.1             |                |
|                                           | HypC hydrogenase expression/formation protein   | r                                          | NZ_AFOC01000025.1 | 20,027..20,263            | WP_005960735.1             |                |
|                                           | hydrogenase maturation protease                 | f                                          | NZ_AFOC01000025.1 | 20,346..20,861            | WP_005960736.1             |                |
|                                           | HyaF hydrogenase -1 operon protein              | f                                          | NZ_AFOC01000025.1 | 20,948..21,388            | WP_005960737.1             |                |
|                                           | [NiFe]hydrogenase small subunit                 | f                                          | NZ_AFOC01000025.1 | 21,405..22,496            | WP_006475471.1             |                |
|                                           | cytochrome b isp1 protein                       | f                                          | NZ_AFOC01000025.1 | 22,493..23,155            | WP_005960739.1             |                |
|                                           | FeS isp2 protein                                | f                                          | NZ_AFOC01000025.1 | 23,152..24,417            | WP_006475472.1             |                |
|                                           | group 1e [NiFe] hydrogenase large subunit       | f                                          | NZ_AFOC01000025.1 | 24,473..26,194            | WP_039959813.1             |                |
|                                           | 3b                                              | 4Fe-FS dicluster domain-containing protein | f                 | NZ_AFOC01000106.1         | 7,748..8,886               | none           |
|                                           |                                                 | NAD(P)H-Flavin reductase (diaphorase?)     | f                 | NZ_AFOC01000106.1         | 6,922..7,755               | WP_006475507.1 |
|                                           |                                                 | [NiFe] hydrogenase small subunit           | f                 | NZ_AFOC01000106.1         | 6,125..6,922               | WP_039960563.1 |
| group 3b [NiFe] hydrogenase large subunit |                                                 | f                                          | NZ_AFOC01000106.1 | 4,822..6,119              | none                       |                |
| hydrogenase maturation protease           |                                                 | f                                          | NZ_AFOC01000106.1 | 4,391..4,822              | WP_005965887.1             |                |
| serine/threonine protein kinase           |                                                 | f                                          | NZ_AFOC01000106.1 | 3,284..4,231              | WP_005965885.1             |                |
